# Supplementary material for: Microwave-assisted surface attachment of aluminium ions on in situ diluted titanium-doped hematite photoanodes for efficient photoelectrochemical water-splitting
Source: Royal Society of Chemistry journal article supplement (doi:10.1039/d2se00459c), 2022-01-01
Supplement: d2se00459c1.pdf [file d2se00459c1.pdf]

## Electronic Supplementary Information

### **Microwave-assisted surface attachment of aluminium ions on *in-situ* diluted titanium-doped hematite photoanodes for efficient photoelectrochemical water-splitting**

Jun Beom Hwang<sup>a, §</sup>, Love Kumar Dhandole<sup>a, §</sup>, Periyasamy Anushkaran<sup>a</sup>, Weon-Sik Chae<sup>b</sup>, Sun Hee Choi<sup>c</sup>, and Hyun Hwi Lee<sup>c, \*,</sup>, Jum Suk Jang<sup>a, \*</sup>

<sup>a</sup>Division of Biotechnology, Safety, Environment and Life Science Institute, College of Environmental and Bioresource Sciences, Jeonbuk National University, Iksan 54596, Republic of Korea.

<sup>b</sup>Daegu Center, Korea Basic Science Institute, Daegu 41566, Republic of Korea.

<sup>c</sup>Pohang Accelerator Laboratory (PAL), Pohang University of Science and Technology (POSTECH), Pohang 37673, Republic of Korea

\*Corresponding authors. Tel.: +82 63 850 0846; fax: +82 63 850 0834.

E-mail addresses: jangjs75@jbnu.ac.kr (J. S. Jang), hhleec@postech.ac.kr (H. H. Lee)

§Authors with equal contributions.

## Supporting experimental details

### *1. Preparation of without dilution titanium-doped Fe<sub>2</sub>O<sub>3</sub> photoanodes by in situ hydrothermal method*

In a typical procedure, a piece of cleaned FTO substrate (1 cm × 2.5 cm) is placed inside a 20 mL volume vial, containing a 10 mL aqueous solution of FeCl<sub>3</sub>·6H<sub>2</sub>O (150 mM; Fe) and NaNO<sub>3</sub> (1 M), appropriate amount of HCl to adjust the pH 1.5. Then, 1 mL of titanium diisopropoxide-bis (acetylacetonate) precursor (4 mol% of the Fe) dissolved in ethanol precursor solution is added dropwise to the resultant hydrothermal solution. Remaining, hydrothermal reaction and calcination conditions were kept similar to the one mentioned in main manuscript, the sample can then be denoted as Ti(4%):Fe<sub>2</sub>O<sub>3</sub> (W/O dilution).

### *2. Preparation of ex situ titanium-doped Fe<sub>2</sub>O<sub>3</sub> photoanodes by dip-coating method*

Further, *ex situ* Ti-doped Fe<sub>2</sub>O<sub>3</sub> photoanode was prepared via dip-coating method. As-prepared EtOH:FeOOH photoanode was dipped in titanium diisopropoxide-bis (acetylacetonate) ethanol based precursor solution (4 mol% of the Fe) for 2 min, as reported previously for Ti *ex situ* doping.<sup>[1]</sup> After that, the dipped photoanode was dried and thermally quenched at same calcination condition as similar as mentioned earlier to prepare *titanium-doped* photoanodes. The as-prepared photoanode was denoted as Ti(4%):Fe<sub>2</sub>O<sub>3</sub> (*ex situ*).

## Tables

**Table S1.** XPS data, showing peak assignment, area under the curve.

| Samples                               | Peak assign                   | B.E (eV) | Area    |
|---------------------------------------|-------------------------------|----------|---------|
| EtOH:Fe <sub>2</sub> O <sub>3</sub>   | Fe <sup>2+</sup>              | 709.4551 | 78844.5 |
|                                       | Fe <sup>3+</sup>              | 710.48   | 202557  |
|                                       | Fe <sup>3+</sup>              | 712.15   | 320595  |
|                                       | Satellite (Fe <sup>3+</sup> ) | 718.46   | 262556  |
|                                       | Fe <sup>2+</sup>              | 723.33   | 112925  |
|                                       | Fe <sup>3+</sup>              | 724.86   | 63088.6 |
|                                       | Fe <sup>3+</sup>              | 726.21   | 178865  |
|                                       | Satellite (Fe <sup>2+</sup> ) | 732.36   | 84147.9 |
| Ti(4%):Fe <sub>2</sub> O <sub>3</sub> | Fe <sup>2+</sup>              | 709.53   | 79351.6 |
|                                       | Fe <sup>3+</sup>              | 710.55   | 177724  |
|                                       | Fe <sup>3+</sup>              | 712.3    | 227096  |
|                                       | Satellite (Fe <sup>3+</sup> ) | 718.81   | 198971  |
|                                       | Fe <sup>2+</sup>              | 723.22   | 51100.1 |
|                                       | Fe <sup>3+</sup>              | 724.63   | 101269  |
|                                       | Fe <sup>3+</sup>              | 726.46   | 94806.5 |
|                                       | Satellite (Fe <sup>2+</sup> ) | 732.54   | 57527.9 |
| Ti(8%):Fe <sub>2</sub> O <sub>3</sub> | Fe <sup>2+</sup>              | 709.52   | 75881.8 |
|                                       | Fe <sup>3+</sup>              | 710.56   | 152247  |
|                                       | Fe <sup>3+</sup>              | 712.3    | 190738  |
|                                       | Satellite (Fe <sup>3+</sup> ) | 718.89   | 142938  |
|                                       | Fe <sup>2+</sup>              | 723.16   | 43491.6 |
|                                       | Fe <sup>3+</sup>              | 724.49   | 78099.8 |
|                                       | Fe <sup>3+</sup>              | 726.14   | 78179.9 |
|                                       | Satellite (Fe <sup>2+</sup> ) | 732.49   | 38874.1 |

**Table S2.** The EIS fitting results for (1) Ti(4%):Fe<sub>2</sub>O<sub>3</sub> (W/O dilution), (2) Ti(4%):Fe<sub>2</sub>O<sub>3</sub> and (3) Ti(4%):Fe<sub>2</sub>O<sub>3</sub> (*ex-situ*) photoanodes.

| Samples<br>measured at 1.23 V vs. RHE | $R_s$ ( $\Omega$ ) | $R_1$ ( $\Omega$ ) | $CPE_1$ ( $\mu$ F) | $R_2$ ( $\Omega$ ) | $CPE_2$ ( $\mu$ F) |
|---------------------------------------|--------------------|--------------------|--------------------|--------------------|--------------------|
| (1)                                   | 35.72              | 34.41              | 37.05              | 233.8              | 139.5              |
| (2)                                   | 29.25              | 34.36              | 32.91              | 119.0              | 194.8              |
| (3)                                   | 27.77              | 91.94              | 37.23              | 132.6              | 253.9              |

**Table S3.** The EIS fitting results for (1) EtOH:Fe<sub>2</sub>O<sub>3</sub>, (2) Ti(4%):Fe<sub>2</sub>O<sub>3</sub> and (3) Ti(8%):Fe<sub>2</sub>O<sub>3</sub> photoanodes.

| Samples/<br>parameters | $R_s$ ( $\Omega$ ) | $R_1$ ( $\Omega$ ) | $CPE_1$ ( $\mu$ F) | $R_2$ ( $\Omega$ ) | $CPE_2$ ( $\mu$ F) |
|------------------------|--------------------|--------------------|--------------------|--------------------|--------------------|
| (1)                    | 29.48              | 182.7              | 17.09              | 148.4              | 61.09              |
| (2)                    | 29.25              | 34.36              | 32.91              | 119.0              | 194.8              |
| (3)                    | 31.65              | 47.63              | 43.00              | 145.6              | 47.30              |

**Table S4.** Minimum imaginary component  $f_{\min}$  (Hz) and electron transport time in the IMPS spectra for (1) EtOH:Fe<sub>2</sub>O<sub>3</sub>, (2) Ti(4%):Fe<sub>2</sub>O<sub>3</sub>, (3) Al(5mM):Fe<sub>2</sub>O<sub>3</sub> and (4) Al(5mM)/Ti(4%):Fe<sub>2</sub>O<sub>3</sub> photoanodes at 1.23 V vs. RHE.

| Samples | $f_{\min}$ (Hz) | Electron transport time ( $\mu$ s) |
|---------|-----------------|------------------------------------|
| (1)     | 493.6           | 323                                |
| (2)     | 501.8           | 317                                |
| (3)     | 246.7           | 645                                |
| (4)     | 731.8           | 218                                |

**Table S5.** Faradaic efficiency for hydrogen and oxygen evolution.

| Sampling time | FE (%) for H <sub>2</sub> evolution |                  |        | FE (%) for O <sub>2</sub> evolution |                  |        |
|---------------|-------------------------------------|------------------|--------|-------------------------------------|------------------|--------|
|               | I <sup>st</sup>                     | II <sup>nd</sup> | Avg.   | I <sup>st</sup>                     | II <sup>nd</sup> | Avg.   |
| 0 min         | 0                                   | 0                | --     | 0                                   | 0                | --     |
| 60 min        | 79.36                               | 81.61            | 80.485 | 82.92                               | 84.90            | 83.91  |
| 120 min       | 83.32                               | 84.53            | 83.925 | 86.11                               | 83.57            | 84.84  |
| 180 min       | 82.53                               | 83.20            | 82.865 | 85.05                               | 84.72            | 84.885 |
| 240 min       | 85.70                               | 86.51            | 86.105 | 84.52                               | 82.35            | 83.435 |
| 300 min       | 84.75                               | 87.32            | 86.035 | 84.20                               | 83.49            | 83.845 |

## Figures

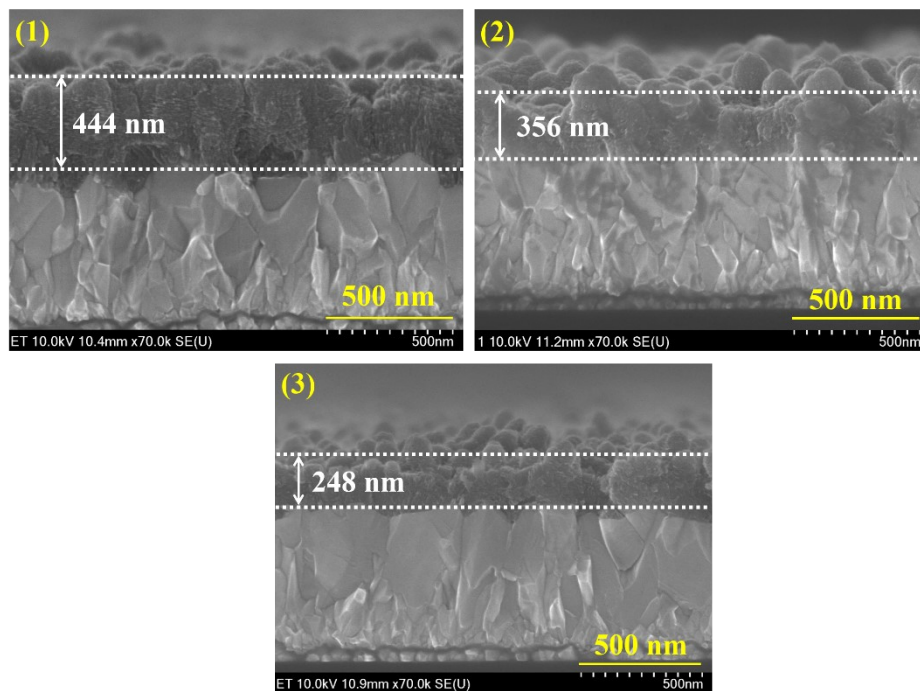

**Fig. S1.** HR-FESEM cross-section images of (1) EtOH:FeOOH, (2) Ti(4%):FeOOH and (3) Ti(8%):FeOOH photoanodes, respectively.

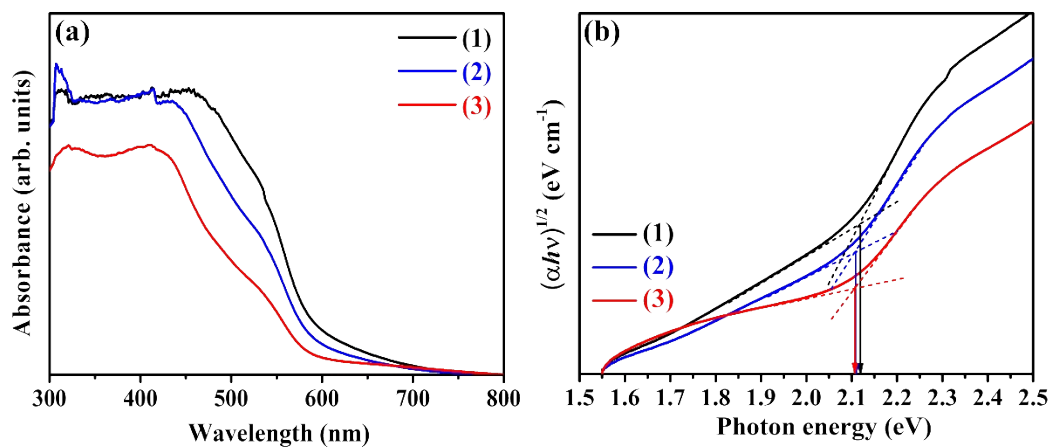

**Fig. S2.** (a) UV-vis-absorbance curves. (b) Tauc plot (In-direct) of (1) EtOH:Fe<sub>2</sub>O<sub>3</sub>, (2) Ti(4%):Fe<sub>2</sub>O<sub>3</sub> and (3) Ti(8%):Fe<sub>2</sub>O<sub>3</sub> photoanodes, respectively.

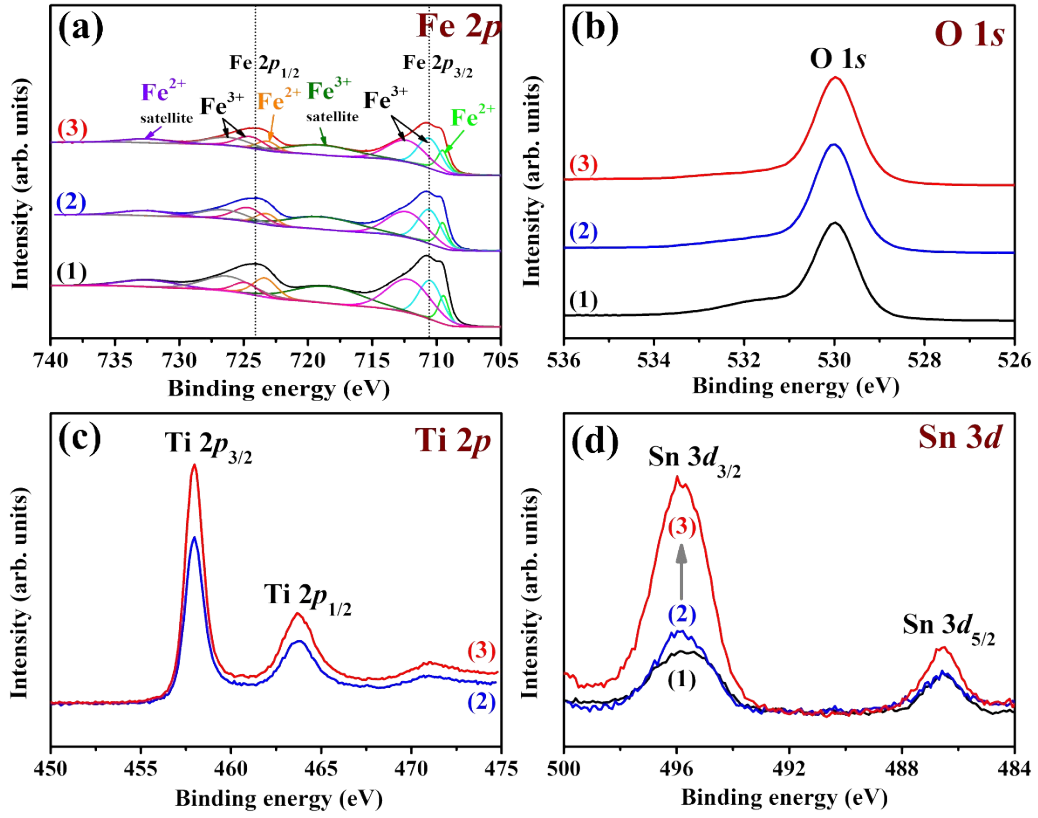

**Fig. S3.** XPS spectra of (1) EtOH:Fe<sub>2</sub>O<sub>3</sub>, (2) Ti(4%):Fe<sub>2</sub>O<sub>3</sub> and (3) Ti(8%):Fe<sub>2</sub>O<sub>3</sub> photoanodes with (a) Fe 2p, (b) O 1s, (c) Ti 2p and (d) Sn 3d, respectively.



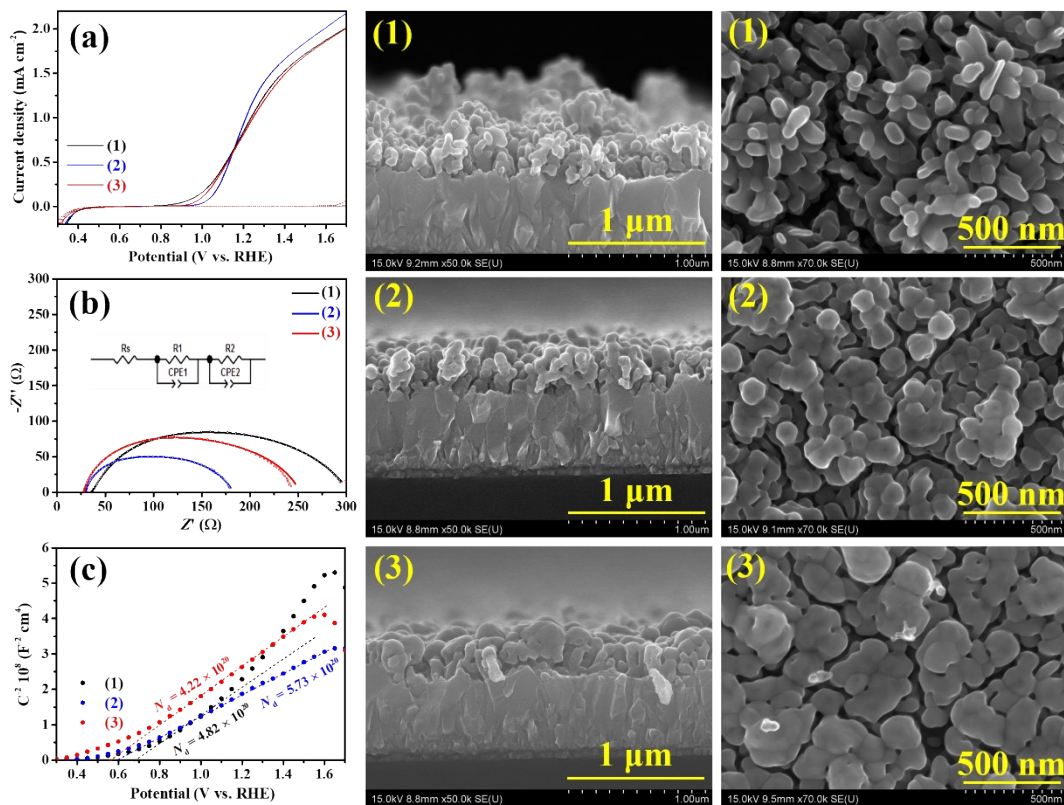

**Fig. S4.** (a) Photocurrent-potential ( $J-V$ ) curves. (b) electrochemical impedance spectroscopy (EIS) Nyquist plots using 1 M NaOH electrolyte under 1 sun standard illumination conditions at 1.23 V vs. RHE. (c) Mott-Schottky plots using 1 M NaOH electrolyte under dark condition, and corresponding HR-FESEM images for (1) Ti(4%):Fe<sub>2</sub>O<sub>3</sub> (W/O dilution), (2) Ti(4%):Fe<sub>2</sub>O<sub>3</sub> and (3) Ti(4%):Fe<sub>2</sub>O<sub>3</sub> (*ex-situ*) hematite photoanodes, respectively.

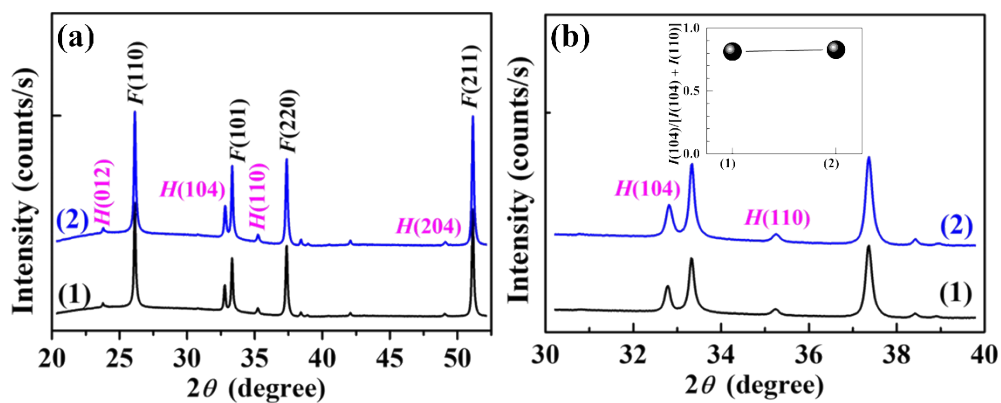

**Fig. S5.** (a) SR X-ray diffraction patterns and (b) XRD profiles near the (104) and (110) peaks (Inset: the (104) intensity fraction indicating its tendency of preferential orientation) of the (1) Ti(4%):Fe<sub>2</sub>O<sub>3</sub> and (2) Al(5mM)/Ti(4%):Fe<sub>2</sub>O<sub>3</sub> photoanodes.

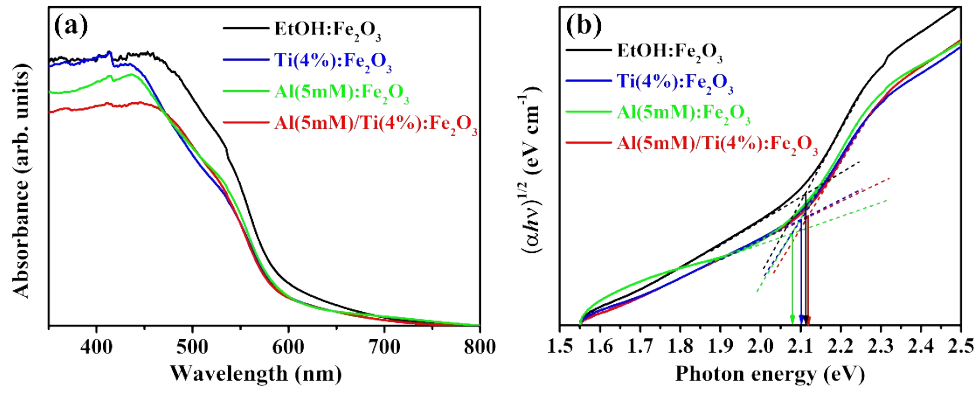

**Fig. S6.** (a) UV-vis-absorbance curve. (b) Tauc plot (In-direct) of EtOH:Fe<sub>2</sub>O<sub>3</sub>, Ti(4%):Fe<sub>2</sub>O<sub>3</sub>, Al(5mM):Fe<sub>2</sub>O<sub>3</sub> and Al(5mM)/Ti(4%):Fe<sub>2</sub>O<sub>3</sub> photoanodes.

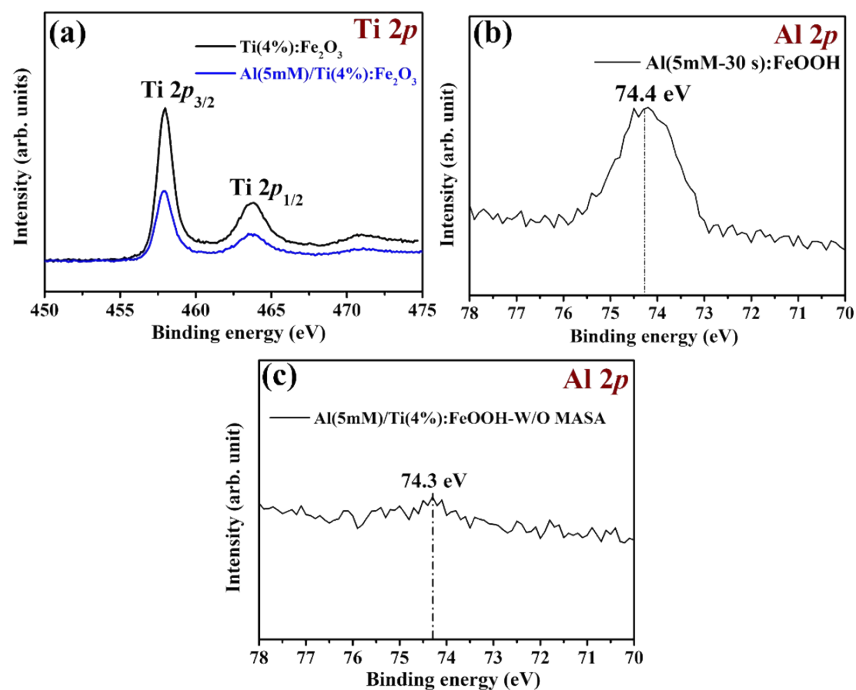

**Fig. S7.** (a) XPS Ti 2p spectra of Ti(4%):Fe<sub>2</sub>O<sub>3</sub> and Al(5mM)/Ti(4%):Fe<sub>2</sub>O<sub>3</sub> photoanodes. (b and c) XPS Al 2p spectra of Al(5mM-30 s):FeOOH and Al(5mM)/Ti(4%):FeOOH-W/O MASA, respectively.

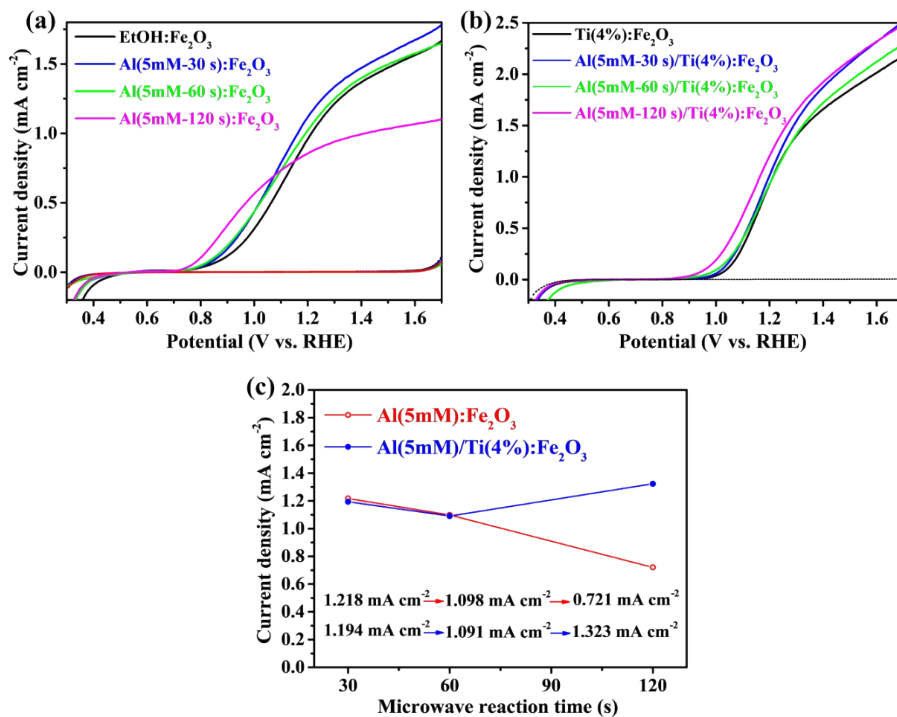

**Fig. S8.** Photocurrent-potential ( $J-V$ ) curves for synthesized by different MASA time (30, 60, 120 s) on (a) Al(5mM):Fe<sub>2</sub>O<sub>3</sub> and (b) Al(5mM)/Ti(4%):Fe<sub>2</sub>O<sub>3</sub> using 1 M NaOH electrolyte under 1 sun standard illumination conditions. (c) Photocurrent vs. reaction time for Al(5mM):Fe<sub>2</sub>O<sub>3</sub> and Al(5mM)/Ti(4%):Fe<sub>2</sub>O<sub>3</sub> photoanodes, respectively.

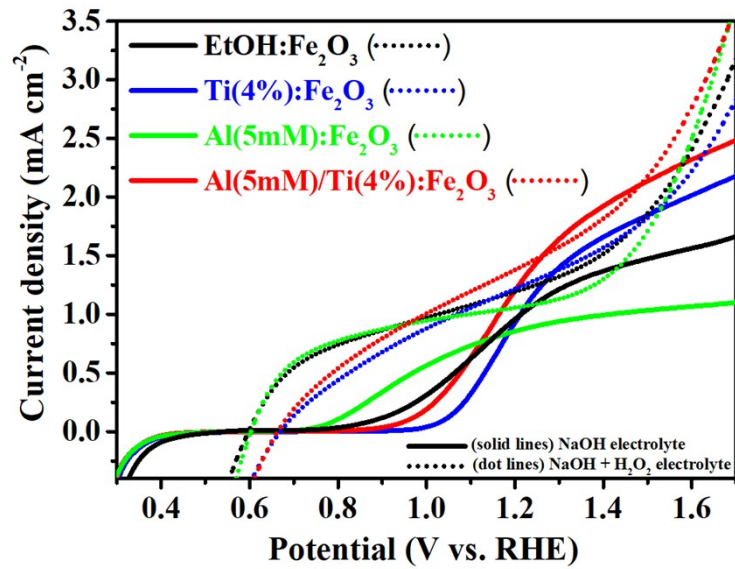

**Fig. S9.** (a) Photocurrent-potential ( $J$ - $V$ ) curves for EtOH:Fe<sub>2</sub>O<sub>3</sub>, Ti(4%):Fe<sub>2</sub>O<sub>3</sub>, Al(5mM):Fe<sub>2</sub>O<sub>3</sub> and Al(5mM)/Ti(4%):Fe<sub>2</sub>O<sub>3</sub> photoanodes with and without H<sub>2</sub>O<sub>2</sub> in the electrolyte.

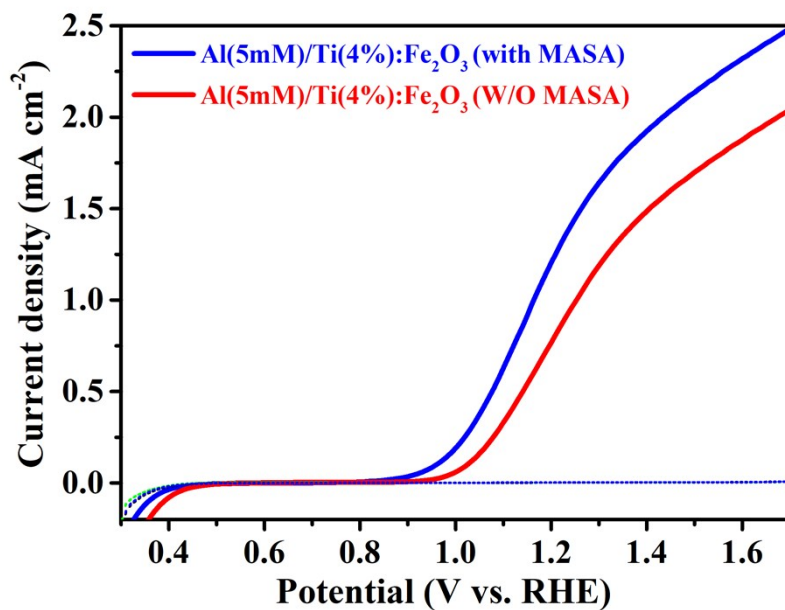

**Fig. S10.** Photocurrent-potential ( $J-V$ ) curves for Al(5mM)/Ti(4%):Fe<sub>2</sub>O<sub>3</sub>-with MASA, Al(5mM)/Ti(4%):Fe<sub>2</sub>O<sub>3</sub>-W/O MASA using 1 M NaOH electrolyte under 1 sun standard illumination conditions.

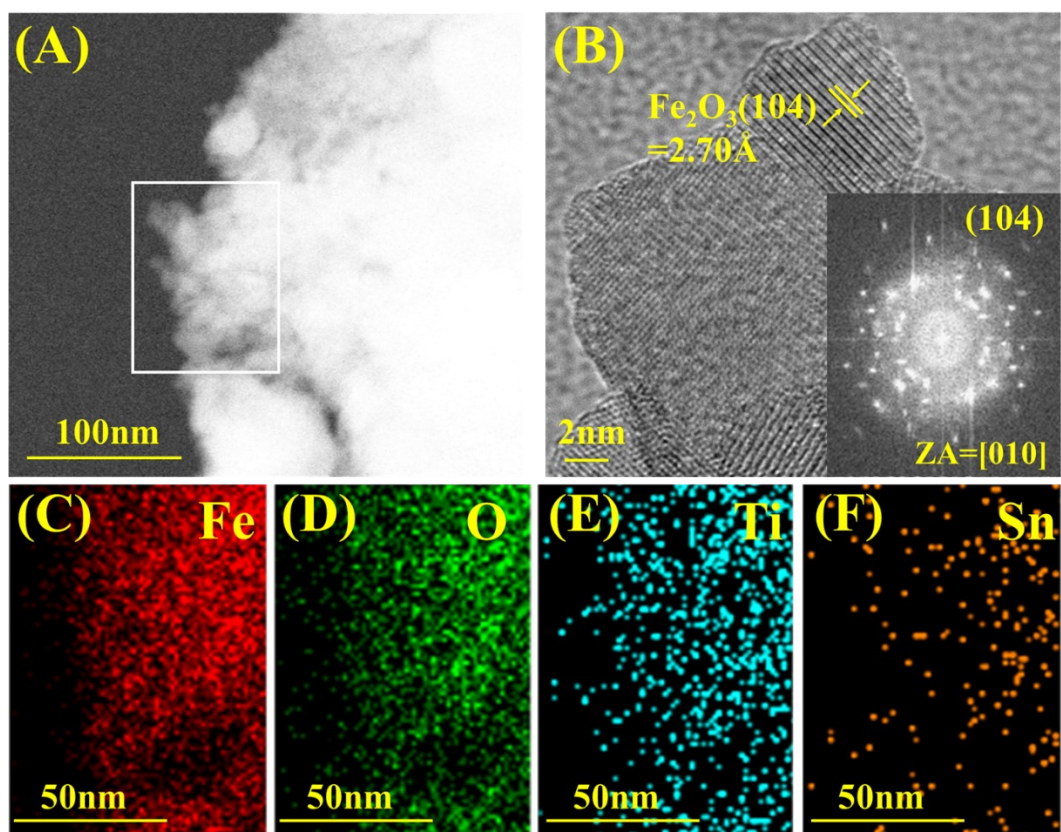

**Fig. S11.** (A) Low-magnification HR-TEM images, (B) ADF-STEM images and (insets) corresponding fast Fourier patterns and (C-F) EDS elemental mapping images for Ti(4%):Fe<sub>2</sub>O<sub>3</sub> photoanode.



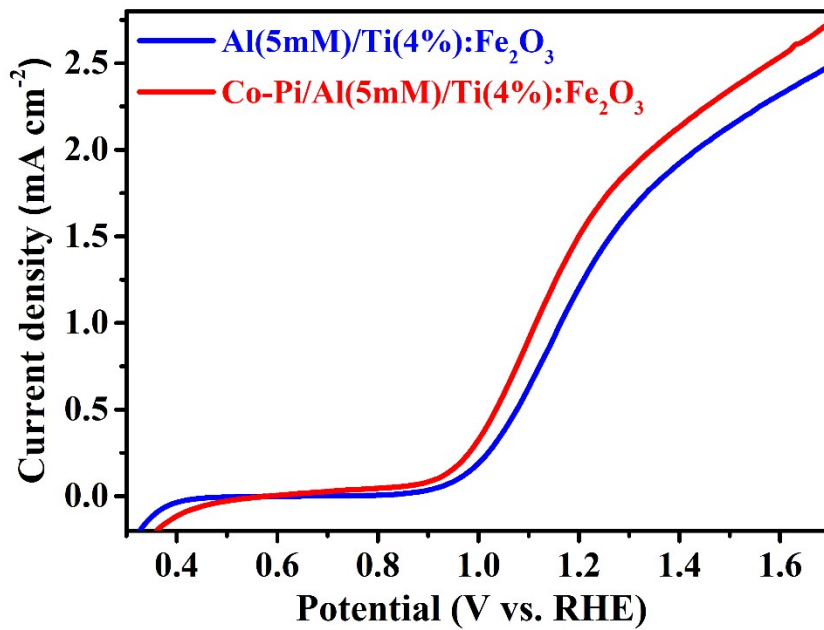

**Fig. S12.** Photocurrent-potential ( $J-V$ ) curves of Al(5mM)/Ti(4%):Fe<sub>2</sub>O<sub>3</sub> and Co-Pi/Al(5mM)/Ti(4%):Fe<sub>2</sub>O<sub>3</sub> photoanodes using 1 M NaOH electrolyte under 1-sun standard illumination conditions.

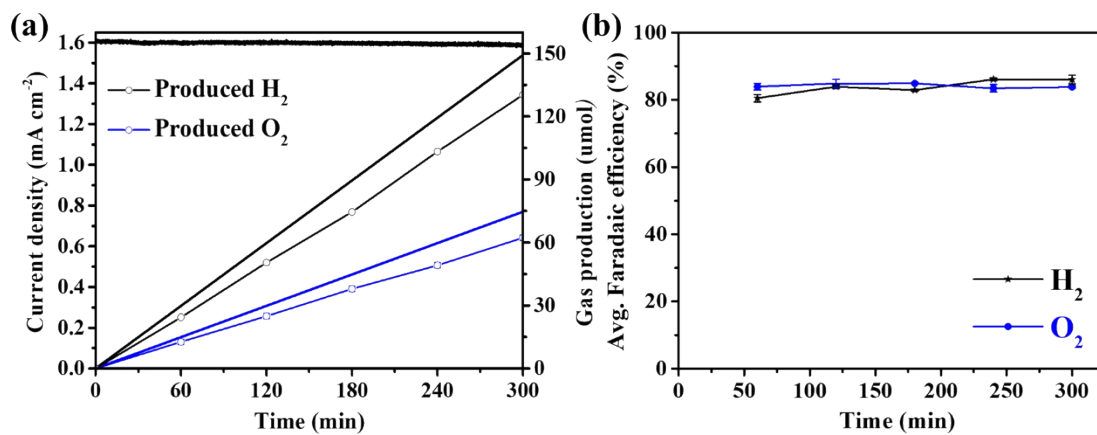

**Fig. S13.** (a) Photocurrent profiles and corresponding time-profiled evolution of O<sub>2</sub> and H<sub>2</sub> using Co-Pi/Al(5mM)/Ti(4%):Fe<sub>2</sub>O<sub>3</sub> electrode, (solid line represents theoretical values), (b) Average faradaic efficiency under simulated solar light illumination (100 mW cm<sup>-2</sup>) in 1 M NaOH over Co-Pi/Al(5mM)/Ti(4%):Fe<sub>2</sub>O<sub>3</sub> photoelectrode.

## Reference

- [1] A. Subramanian, E. Gracia-Espino, A. Annamalai, H. H. Lee, S. Y. Lee, S. H. Choi and J. S. Jang, *Appl. Surf. Sci.*, 2018, **427**, 1203–1212.
